# Supplementary material for: The Impact of Pigment-Epithelium-Derived Factor on MCF-7 Cell Metabolism in the Context of Glycaemic Condition
Source: MDPI journal article supplement (doi:10.3390/pharmaceutics15082140), 2023-08-14
Supplement: s1 [file s1]

# **The Impact of Pigment-Epithelium-Derived Factor on MCF-7 Cell Metabolism in the Context of Glycaemic Condition**

Raziyeh Abooshahab <sup>1,2</sup>, Kourosh Hooshmand <sup>3</sup>, Hani-Al Salami <sup>1,4</sup> and Crispin R. Dass <sup>1,2, \*</sup>

<sup>1</sup>Curtin Medical School, Curtin University, Bentley, WA 6102, Australia

<sup>2</sup>Curtin Health Innovation Research Institute, Curtin Medical School, Curtin University, Bentley, WA 6102, Australia

<sup>3</sup>System Medicine, Steno Diabetes Center Copenhagen, 2730 Copenhagen, Denmark

<sup>4</sup>Biotechnology and Drug Development Research Laboratory, Curtin Health Innovation Research Institute, Bentley, WA 6102, Australia

*\* Corresponding author*

Crispin R. Dass (PhD), Professor,

Curtin Medical School, Curtin University, Bentley 6102, Australia.

**Office:** Curtin Health Innovation Research Institute, Bldg 305, Room 124, Curtin University, Bentley campus.

**Phone:** +61 8 9266 1489

**E-mail:** [crispin.dass@curtin.edu.au](mailto:crispin.dass@curtin.edu.au)

**Supplemental Figure S1** Cross-validated R2Y and Q2 coefficients and permutation test.

**Supplemental Table S1** List of identified metabolites extracted from MS-DIAL

**Supplemental Table S2** Classification of metabolites formed from the ClassyFire system

**Supplemental Table S3** Pathway Enrichment analysis of altered metabolites

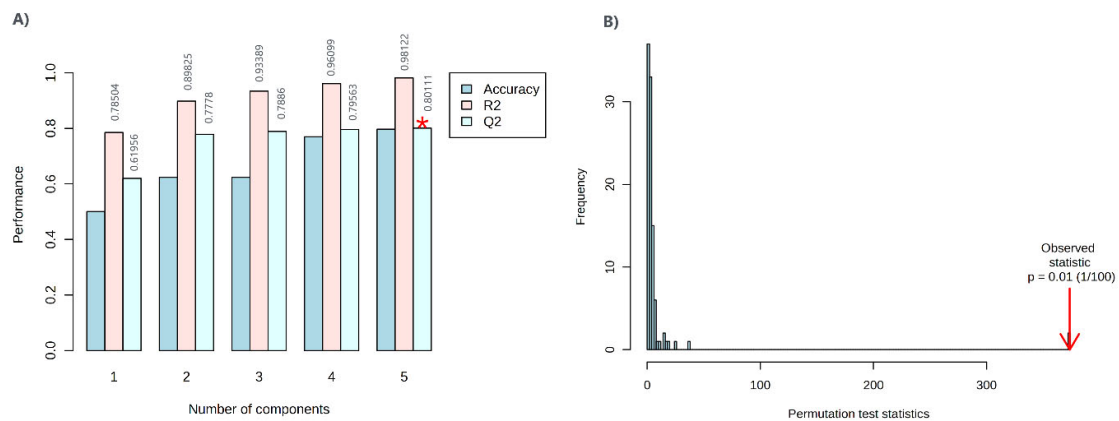

**Figure S1: A)** Cross-validated R2Y and Q2 coefficients. The red asterisk implies the best classifier. **B)** Based on the histogram displaying the permutation test results with a permutation number of  $n=100$ , it is clear that the model has been determined to be significant.

**Table S1** List of identified metabolites extracted from MS-DIAL

| <b>Metabolite name</b>         | <b>Average Rt(min)</b> | <b>Average RI</b> | <b>Quant mass</b> |
|--------------------------------|------------------------|-------------------|-------------------|
| <b>1-Methylhistamine</b>       | 10.085                 | 1738.14           | 174.1294          |
| <b>1-Monopalmitin</b>          | 14                     | 2584.1            | 371.4             |
| <b>3-Methylglutaconic acid</b> | 8.773                  | 1512.32           | 191.12            |
| <b>Aminomalonic acid</b>       | 8.571                  | 1481.78           | 147.0867          |
| <b>Arachidonic acid</b>        | 13.157                 | 2385.64           | 79.0125           |
| <b>beta-Alanine</b>            | 8.288                  | 1441.1            | 174.1             |
| <b>Cholesterol</b>             | 17.216                 | 3263.57           | 129.1             |
| <b>Citric acid</b>             | 10.62                  | 1843.05           | 73.1              |
| <b>Cysteine</b>                | 9.109                  | 1568.69           | 69                |
| <b>Dihydrouracil</b>           | 6.221                  | 1150.24           | 73.08333          |
| <b>3-Hydroxybutyric acid</b>   | 6.272                  | 1156.72           | 191.1143          |
| <b>Homocysteine</b>            | 9.746                  | 1676.32           | 234.1231          |
| <b>D-Threitol</b>              | 8.811                  | 1518.49           | 217.1429          |
| <b>Ethanolamine</b>            | 7.188                  | 1286.33           | 174.1167          |
| <b>Fumaric acid</b>            | 7.574                  | 1340.79           | 117.0667          |
| <b>Glycerol</b>                | 7.227                  | 1290.2            | 73.1              |
| <b>Glycine</b>                 | 7.484                  | 1328.16           | 174.1833          |
| <b>Hypotaurine</b>             | 9.403                  | 1618.09           | 156.05            |
| <b>Arabitol</b>                | 10.145                 | 1749.89           | 69.07895          |
| <b>Malate</b>                  | 8.657                  | 1494.04           | 147.0846          |
| <b>Proline</b>                 | 7.419                  | 1318.96           | 142.1046          |
| <b>Threonine</b>               | 8.02                   | 1403.65           | 73.1              |
| <b>Lactic acid</b>             | 5.575                  | 1043.76           | 73.1              |
| <b>Lysine</b>                  | 11.142                 | 1945.45           | 174.15            |
| <b>Oxoproline</b>              | 8.92                   | 1537.04           | 156.112           |
| <b>Alanine</b>                 | 5.918                  | 1106.82           | 116.1             |
| <b>Aspartic acid</b>           | 8.254                  | 1437.24           | 75                |
| <b>Glutamic acid</b>           | 9.46                   | 1627.64           | 246.2053          |
| <b>Isoleucine</b>              | 7.21                   | 1289.43           | 158.1913          |
| <b>Methionine</b>              | 8.886                  | 1531.21           | 176.125           |
| <b>Ornithine</b>               | 10.614                 | 1842              | 142.1             |

|                              |        |         |          |
|------------------------------|--------|---------|----------|
| <b>Phenylalanine</b>         | 9.563  | 1645.04 | 73.09583 |
| <b>Serine</b>                | 7.827  | 1376.54 | 73.1     |
| <b>Tyrosine</b>              | 11.243 | 1965.28 | 218.175  |
| <b>Valine</b>                | 6.472  | 1185.12 | 73.1     |
| <b>Malonic acid</b>          | 6.426  | 1178.74 | 147.1    |
| <b>Maltose</b>               | 14.656 | 2742.47 | 73.1     |
| <b>Melibiose</b>             | 14.736 | 2761.82 | 73.1     |
| <b>Methylmalonic acid</b>    | 6.609  | 1204.44 | 147.0955 |
| <b>myo-Inositol</b>          | 12.073 | 2133.36 | 202.1    |
| <b>Oleic acid</b>            | 12.473 | 2226.03 | 73.1     |
| <b>O-Phosphoethanolamine</b> | 10.447 | 1809.17 | 73.09    |
| <b>Palmitic acid</b>         | 11.669 | 2048.86 | 73.1     |
| <b>Palmitoleic Acid</b>      | 11.586 | 2032.5  | 117.0333 |
| <b>Pimelic acid</b>          | 9.351  | 1609.43 | 149.0444 |
| <b>Stearic acid</b>          | 12.572 | 2251.34 | 341.4    |
| <b>Succinic acid</b>         | 7.485  | 1326.34 | 147.1    |
| <b>Uracil</b>                | 7.812  | 1374.52 | 241.1    |

RT retention time, RI retention indices

**Table S2** Classification of metabolites formed from the ClassyFire system

| InChIKey                    | Kingdom           | Superclass                      | Class                            | Subclass                             | Parent Level 1                      | Parent Level 2                    | Parent Level 3           | Parent Level 4 |
|-----------------------------|-------------------|---------------------------------|----------------------------------|--------------------------------------|-------------------------------------|-----------------------------------|--------------------------|----------------|
| FHQDWPCFSJMNCT-UHFFFAOYSA-N | Organic compounds | Organic nitrogen compounds      | Organonitrogen compounds         | Amines                               | Primary amines                      | 2-arylethylamines                 |                          |                |
| LUHPQMTVPLRAQA-UHFFFAOYSA-N | Organic compounds | Lipids and lipid-like molecules | Fatty Acyls                      | Fatty acid esters                    | Fatty acid esters                   |                                   |                          |                |
| LVVVFIKBESNWRW-CSKARUKUSA-N | Organic compounds | Organometallic compounds        | Organometalloid compounds        | Organosilicon compounds              | Trimethylsilyl esters               |                                   |                          |                |
| HFJBTSWFKQDXSU-UHFFFAOYSA-N | Organic compounds | Organic acids and derivatives   | Carboxylic acids and derivatives | Amino acids, peptides, and analogues | Amino acids and derivatives         | Alpha amino acids and derivatives |                          |                |
| YZXBAPSDXZZRGB-DOFZRALJSA-N | Organic compounds | Lipids and lipid-like molecules | Fatty Acyls                      | Fatty acids and conjugates           | Long-chain fatty acids              |                                   |                          |                |
| UCMIRNVEIXFBKS-UHFFFAOYSA-N | Organic compounds | Organic acids and derivatives   | Carboxylic acids and derivatives | Amino acids, peptides, and analogues | Amino acids and derivatives         | Beta amino acids and derivatives  |                          |                |
| SGNBVLSWZMBQTH-PODYLOTMSA-N | Organic compounds | Lipids and lipid-like molecules | Steroids and steroid derivatives | Ergostane steroids                   | Ergosterols and derivatives         |                                   |                          |                |
| KRKNYBCHXYNGOX-UHFFFAOYSA-N | Organic compounds | Organic acids and derivatives   | Carboxylic acids and derivatives | Tricarboxylic acids and derivatives  | Tricarboxylic acids and derivatives |                                   |                          |                |
| XUJNEKJLAYXESH-UHFFFAOYNA-N | Organic compounds | Organic acids and derivatives   | Carboxylic acids and derivatives | Amino acids, peptides, and analogues | Amino acids and derivatives         | Alpha amino acids and derivatives | Cysteine and derivatives |                |

|                             |                   |                               |                                  |                                           |                                    |                                   |                   |  |
|-----------------------------|-------------------|-------------------------------|----------------------------------|-------------------------------------------|------------------------------------|-----------------------------------|-------------------|--|
| OIVLITBTBDPEFK-UHFFFAOYSA-N | Organic compounds | Organoheterocyclic compounds  | Diazines                         | Pyrimidines and pyrimidine derivatives    | Pyrimidones                        |                                   |                   |  |
| WHBMMWSBFZVSSR-UHFFFAOYSA-N | Organic compounds | Organic acids and derivatives | Hydroxy acids and derivatives    | Beta hydroxy acids and derivatives        | Beta hydroxy acids and derivatives |                                   |                   |  |
| FFFHZYDWPBMWHY-UHFFFAOYSA-N | Organic compounds | Organic acids and derivatives | Carboxylic acids and derivatives | Amino acids, peptides, and analogues      | Amino acids and derivatives        | Alpha amino acids and derivatives | Alpha amino acids |  |
| UNXHWFMMPAWVPI-QWWZWVQMSA-N | Organic compounds | Organic oxygen compounds      | Organooxygen compounds           | Carbohydrates and carbohydrate conjugates | Sugar alcohols                     |                                   |                   |  |
| MZTOEZRUGVLOG-UHFFFAOYSA-N  | Organic compounds | Organometallic compounds      | Organometalloid compounds        | Organosilicon compounds                   | Organoheterosilanes                | Trialkylheterosilanes             |                   |  |
| VZCYOOQTPOCHFL-OWOJBTEDSA-N | Organic compounds | Organic acids and derivatives | Carboxylic acids and derivatives | Dicarboxylic acids and derivatives        | Dicarboxylic acids and derivatives |                                   |                   |  |
| JQUGYGVCECHKBA-UHFFFAOYSA-N | Organic compounds | Organometallic compounds      | Organometalloid compounds        | Organosilicon compounds                   | Organoheterosilanes                | Trialkylheterosilanes             |                   |  |
| DHMQDGOQFOQNFH-UHFFFAOYSA-N | Organic compounds | Organic acids and derivatives | Carboxylic acids and derivatives | Amino acids, peptides, and analogues      | Amino acids and derivatives        | Alpha amino acids and derivatives | Alpha amino acids |  |
| VVIUBCNYACGLLV-UHFFFAOYSA-N | Organic compounds | Organic acids and derivatives | Sulfinic acids and derivatives   | Sulfinic acids                            | Sulfinic acids                     |                                   |                   |  |
| SUZLPERYXSOGNY-UHFFFAOYSA-N | Organic compounds | Organic oxygen compounds      | Organooxygen compounds           | Carbohydrates and carbohydrate conjugates | Monosaccharides                    |                                   |                   |  |

|                                 |                      |                                  |                                     |                                            |                                        |                                      |                                  |                        |
|---------------------------------|----------------------|----------------------------------|-------------------------------------|--------------------------------------------|----------------------------------------|--------------------------------------|----------------------------------|------------------------|
| BJEPYKJPYRNKOW-<br>REOHCLBHSA-N | Organic<br>compounds | Organic acids and<br>derivatives | Hydroxy acids<br>and derivatives    | Beta hydroxy<br>acids and<br>derivatives   | Beta hydroxy acids<br>and derivatives  |                                      |                                  |                        |
| ONIBWKKTPOVIA-<br>BYPYZUCNSA-N  | Organic<br>compounds | Organic acids and<br>derivatives | Carboxylic acids<br>and derivatives | Amino acids,<br>peptides, and<br>analogues | Amino acids and<br>derivatives         | Alpha amino acids<br>and derivatives | Proline and<br>derivatives       |                        |
| AYFVYJQAPQTCCC-<br>GBXIUSLDSA-N | Organic<br>compounds | Organic acids and<br>derivatives | Carboxylic acids<br>and derivatives | Amino acids,<br>peptides, and<br>analogues | Amino acids and<br>derivatives         | Alpha amino acids<br>and derivatives | Alpha amino<br>acids             | L-alpha-amino<br>acids |
| JVTAAEKCFNVCJ-<br>REOHCLBHSA-N  | Organic<br>compounds | Organic acids and<br>derivatives | Hydroxy acids<br>and derivatives    | Alpha hydroxy<br>acids and<br>derivatives  | Alpha hydroxy acids<br>and derivatives |                                      |                                  |                        |
| KDXKERNBIXSRK-<br>YFKPBYRVSA-N  | Organic<br>compounds | Organic acids and<br>derivatives | Carboxylic acids<br>and derivatives | Amino acids,<br>peptides, and<br>analogues | Amino acids and<br>derivatives         | Alpha amino acids<br>and derivatives | Alpha amino<br>acids             | L-alpha-amino<br>acids |
| QACGFKAUSXGLCU-<br>UHFFFAOYSA-N | Organic<br>compounds | Organic acids and<br>derivatives | Carboxylic acids<br>and derivatives | Amino acids,<br>peptides, and<br>analogues | Amino acids and<br>derivatives         | Alpha amino acids<br>and derivatives | Proline and<br>derivatives       |                        |
| QNAYBMKLOCPYGJ-<br>REOHCLBHSA-N | Organic<br>compounds | Organic acids and<br>derivatives | Carboxylic acids<br>and derivatives | Amino acids,<br>peptides, and<br>analogues | Amino acids and<br>derivatives         | Alpha amino acids<br>and derivatives | Alanine and<br>derivatives       |                        |
| UTGZLLJGNUQPMX-<br>UHFFFAOYSA-N | Organic<br>compounds | Organic acids and<br>derivatives | Carboxylic acids<br>and derivatives | Amino acids,<br>peptides, and<br>analogues | Amino acids and<br>derivatives         | Alpha amino acids<br>and derivatives | Aspartic acid<br>and derivatives |                        |
| WHUUTDBJXRKMK-<br>VKHMYHEASA-N  | Organic<br>compounds | Organic acids and<br>derivatives | Carboxylic acids<br>and derivatives | Amino acids,<br>peptides, and<br>analogues | Amino acids and<br>derivatives         | Alpha amino acids<br>and derivatives | Glutamic acid<br>and derivatives |                        |

|                             |                   |                               |                                  |                                           |                                    |                                   |                               |                     |
|-----------------------------|-------------------|-------------------------------|----------------------------------|-------------------------------------------|------------------------------------|-----------------------------------|-------------------------------|---------------------|
| AGPKZVBTJJNPAG-WHFBIAKZSA-N | Organic compounds | Organic acids and derivatives | Carboxylic acids and derivatives | Amino acids, peptides, and analogues      | Amino acids and derivatives        | Alpha amino acids and derivatives | Isoleucine and derivatives    |                     |
| FFEARJCKVFRZRR-BYPYZUCNSA-N | Organic compounds | Organic acids and derivatives | Carboxylic acids and derivatives | Amino acids, peptides, and analogues      | Amino acids and derivatives        | Alpha amino acids and derivatives | Methionine and derivatives    |                     |
| AHLPHDHHMVZTML-BYPYZUCNSA-N | Organic compounds | Organic acids and derivatives | Carboxylic acids and derivatives | Amino acids, peptides, and analogues      | Amino acids and derivatives        | Alpha amino acids and derivatives | Alpha amino acids             | L-alpha-amino acids |
| COLNVLDHVKWLRT-QMMMGOBSA-N  | Organic compounds | Organic acids and derivatives | Carboxylic acids and derivatives | Amino acids, peptides, and analogues      | Amino acids and derivatives        | Alpha amino acids and derivatives | Phenylalanine and derivatives |                     |
| MTCFGRXMJLQNBG-REOHCLBHSA-N | Organic compounds | Organic acids and derivatives | Carboxylic acids and derivatives | Amino acids, peptides, and analogues      | Amino acids and derivatives        | Alpha amino acids and derivatives | Serine and derivatives        |                     |
| WMWBCQXPKSQMOK-KRWDZBQOSA-N | Organic compounds | Organic acids and derivatives | Carboxylic acids and derivatives | Amino acids, peptides, and analogues      | Amino acids and derivatives        | Alpha amino acids and derivatives | Phenylalanine and derivatives |                     |
| KZSNJWFQEVHDMF-BYPYZUCNSA-N | Organic compounds | Organic acids and derivatives | Carboxylic acids and derivatives | Amino acids, peptides, and analogues      | Amino acids and derivatives        | Alpha amino acids and derivatives | Valine and derivatives        |                     |
| OFOBLEOULBTSOW-UHFFFAOYSA-N | Organic compounds | Organic acids and derivatives | Carboxylic acids and derivatives | Dicarboxylic acids and derivatives        | Dicarboxylic acids and derivatives |                                   |                               |                     |
| GUBGYTABKSRVRQ-PICCSMPSSA-N | Organic compounds | Organic oxygen compounds      | Organooxygen compounds           | Carbohydrates and carbohydrate conjugates | Glycosyl compounds                 | O-glycosyl compounds              |                               |                     |



|                             |                   |                                 |                                          |                                           |                                        |                      |  |  |
|-----------------------------|-------------------|---------------------------------|------------------------------------------|-------------------------------------------|----------------------------------------|----------------------|--|--|
| DLRVVDZNNYCBX-CQHUIXDMSA-N  | Organic compounds | Organic oxygen compounds        | Organooxygen compounds                   | Carbohydrates and carbohydrate conjugates | Glycosyl compounds                     | O-glycosyl compounds |  |  |
| ZIYVHBGGAOATLY-UHFFFAOYSA-N | Organic compounds | Organic acids and derivatives   | Carboxylic acids and derivatives         | Dicarboxylic acids and derivatives        | Dicarboxylic acids and derivatives     |                      |  |  |
| CDAISMWEOUEBRE-GPIVLXJGSA-N | Organic compounds | Organic oxygen compounds        | Organooxygen compounds                   | Alcohols and polyols                      | Secondary alcohols                     | Cyclohexanols        |  |  |
| ZQPPMHVWECSIRJ-KTKRTIGZSA-N | Organic compounds | Lipids and lipid-like molecules | Fatty Acyls                              | Fatty acids and conjugates                | Long-chain fatty acids                 |                      |  |  |
| SUHOOTKUPISOBE-UHFFFAOYSA-N | Organic compounds | Organic acids and derivatives   | Organic phosphoric acids and derivatives | Phosphate esters                          | Phosphoethanolamines                   |                      |  |  |
| IPCSVZSSVZVIGE-UHFFFAOYSA-N | Organic compounds | Lipids and lipid-like molecules | Fatty Acyls                              | Fatty acids and conjugates                | Long-chain fatty acids                 |                      |  |  |
| UNUADFKHVGBUHA-KHPPLWFESA-N | Organic compounds | Organometallic compounds        | Organometalloid compounds                | Organosilicon compounds                   | Trimethylsilyl esters                  |                      |  |  |
| VOLKRTUGJXKFMI-UHFFFAOYSA-N | Organic compounds | Organometallic compounds        | Organometalloid compounds                | Organosilicon compounds                   | Trimethylsilyl esters                  |                      |  |  |
| QIQXTHQIDYTFRH-UHFFFAOYSA-N | Organic compounds | Lipids and lipid-like molecules | Fatty Acyls                              | Fatty acids and conjugates                | Long-chain fatty acids                 |                      |  |  |
| KDYFGRWQOYBRFD-UHFFFAOYSA-N | Organic compounds | Organic acids and derivatives   | Carboxylic acids and derivatives         | Dicarboxylic acids and derivatives        | Dicarboxylic acids and derivatives     |                      |  |  |
| FSBNTQRWSOTNEW-UHFFFAOYSA-N | Organic compounds | Organoheterocyclic compounds    | Diazines                                 | Pyrimidines and pyrimidine derivatives    | Pyrimidines and pyrimidine derivatives |                      |  |  |

**Table S3:** Pathway enrichment analysis of altered metabolites

| <b>Metabolic Pathways</b>                   | <b><sup>a</sup>Total</b> | <b><sup>b</sup>Hits</b> | <b><sup>c</sup>Raw p</b> | <b><sup>d</sup>FDR</b> |
|---------------------------------------------|--------------------------|-------------------------|--------------------------|------------------------|
| Arginine and Proline Metabolism             | 53                       | 4                       | 0.00233                  | 0.128                  |
| Glycine and Serine Metabolism               | 59                       | 4                       | 0.00348                  | 0.128                  |
| Citric Acid Cycle                           | 32                       | 3                       | 0.00504                  | 0.128                  |
| Beta-Alanine Metabolism                     | 34                       | 3                       | 0.006                    | 0.128                  |
| Aspartate Metabolism                        | 35                       | 3                       | 0.00652                  | 0.128                  |
| Methionine Metabolism                       | 43                       | 3                       | 0.0117                   | 0.19                   |
| Glutamate Metabolism                        | 49                       | 3                       | 0.0167                   | 0.234                  |
| Mitochondrial Electron Transport Chain      | 19                       | 2                       | 0.0193                   | 0.235                  |
| Betaine Metabolism                          | 21                       | 2                       | 0.0234                   | 0.235                  |
| Carnitine Synthesis                         | 22                       | 2                       | 0.0255                   | 0.235                  |
| Warburg Effect                              | 58                       | 3                       | 0.0263                   | 0.235                  |
| Urea Cycle                                  | 29                       | 2                       | 0.0429                   | 0.35                   |
| Purine Metabolism                           | 74                       | 3                       | 0.0497                   | 0.36                   |
| Ammonia Recycling                           | 32                       | 2                       | 0.0514                   | 0.36                   |
| Propanoate Metabolism                       | 42                       | 2                       | 0.0836                   | 0.546                  |
| Homocysteine Degradation                    | 9                        | 1                       | 0.101                    | 0.619                  |
| Malate-Aspartate Shuttle                    | 10                       | 1                       | 0.112                    | 0.644                  |
| Ketone Body Metabolism                      | 13                       | 1                       | 0.143                    | 0.714                  |
| Pyrimidine Metabolism                       | 59                       | 2                       | 0.149                    | 0.714                  |
| Valine, Leucine and Isoleucine Degradation  | 60                       | 2                       | 0.153                    | 0.714                  |
| Vitamin K Metabolism                        | 14                       | 1                       | 0.153                    | 0.714                  |
| Bile Acid Biosynthesis                      | 65                       | 2                       | 0.174                    | 0.741                  |
| Alanine Metabolism                          | 17                       | 1                       | 0.183                    | 0.741                  |
| Spermidine and Spermine Biosynthesis        | 18                       | 1                       | 0.193                    | 0.741                  |
| Butyrate Metabolism                         | 19                       | 1                       | 0.202                    | 0.741                  |
| Tyrosine Metabolism                         | 72                       | 2                       | 0.204                    | 0.741                  |
| Catecholamine Biosynthesis                  | 20                       | 1                       | 0.212                    | 0.741                  |
| Threonine and 2-Oxobutanoate Degradation    | 20                       | 1                       | 0.212                    | 0.741                  |
| Glutathione Metabolism                      | 21                       | 1                       | 0.221                    | 0.748                  |
| Transfer of Acetyl Groups into Mitochondria | 22                       | 1                       | 0.231                    | 0.753                  |
| Oxidation of Branched Chain Fatty Acids     | 26                       | 1                       | 0.267                    | 0.817                  |
| Phytanic Acid Peroxisomal Oxidation         | 26                       | 1                       | 0.267                    | 0.817                  |
| Phenylalanine and Tyrosine Metabolism       | 28                       | 1                       | 0.284                    | 0.844                  |
| Porphyrin Metabolism                        | 40                       | 1                       | 0.382                    | 1                      |
| Histidine Metabolism                        | 43                       | 1                       | 0.404                    | 1                      |
| Steroidogenesis                             | 43                       | 1                       | 0.404                    | 1                      |
| Steroid Biosynthesis                        | 48                       | 1                       | 0.44                     | 1                      |
| Pyruvate Metabolism                         | 48                       | 1                       | 0.44                     | 1                      |

<sup>a</sup> Total Cmpd: total number of compounds in the pathway, <sup>b</sup> Hit: actually matched number from the data

<sup>c</sup> Raw p: p-value calculated from the enrichment analysis, <sup>d</sup> FDR: p-value adjusted using False Discovery Rate
